# Supplementary material for: De novo metastatic breast cancer in men vs women: a Swedish population-based cohort study
Source: PubMed Central journal article supplement (PMC10444027; doi:10.1093/jncics/pkad050), 2023-07-25
Supplement: pkad050_supplementary_data.pdf [file pkad050_supplementary_data.pdf]

Supplementary material

Supplementary Figure 1

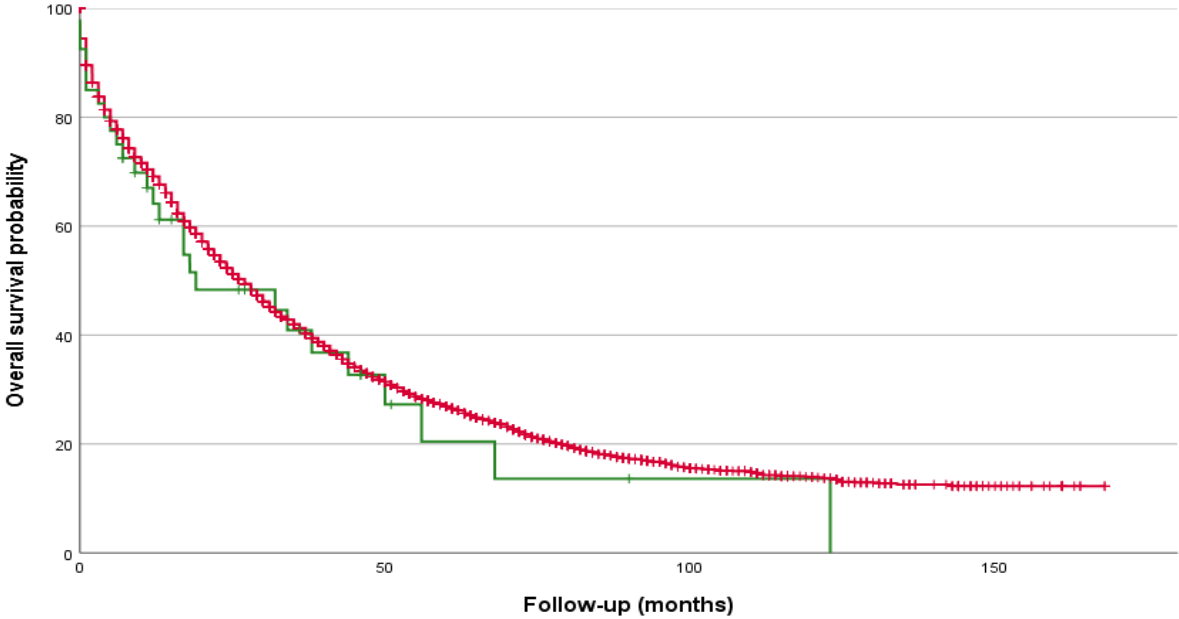

**Supplementary Figure 1:** Kaplan-Meier survival curve for overall survival in the dnMBC analysis. This figure analyzes the survival of 6005 women and 41 men with dnMBC.
